# Supplementary material for: Mycobacterial Esx-3 Requires Multiple Components for Iron Acquisition
Source: PubMed Central journal article supplement — mBio. 2014 May 6;5(3):e01073-14. doi: 10.1128/mBio.01073-14 (PMC4010830; doi:10.1128/mbio.01073-14), 2014-05-06
Supplement: mbo002141823sf01.pdf [file mbo002141823sf01.pdf]

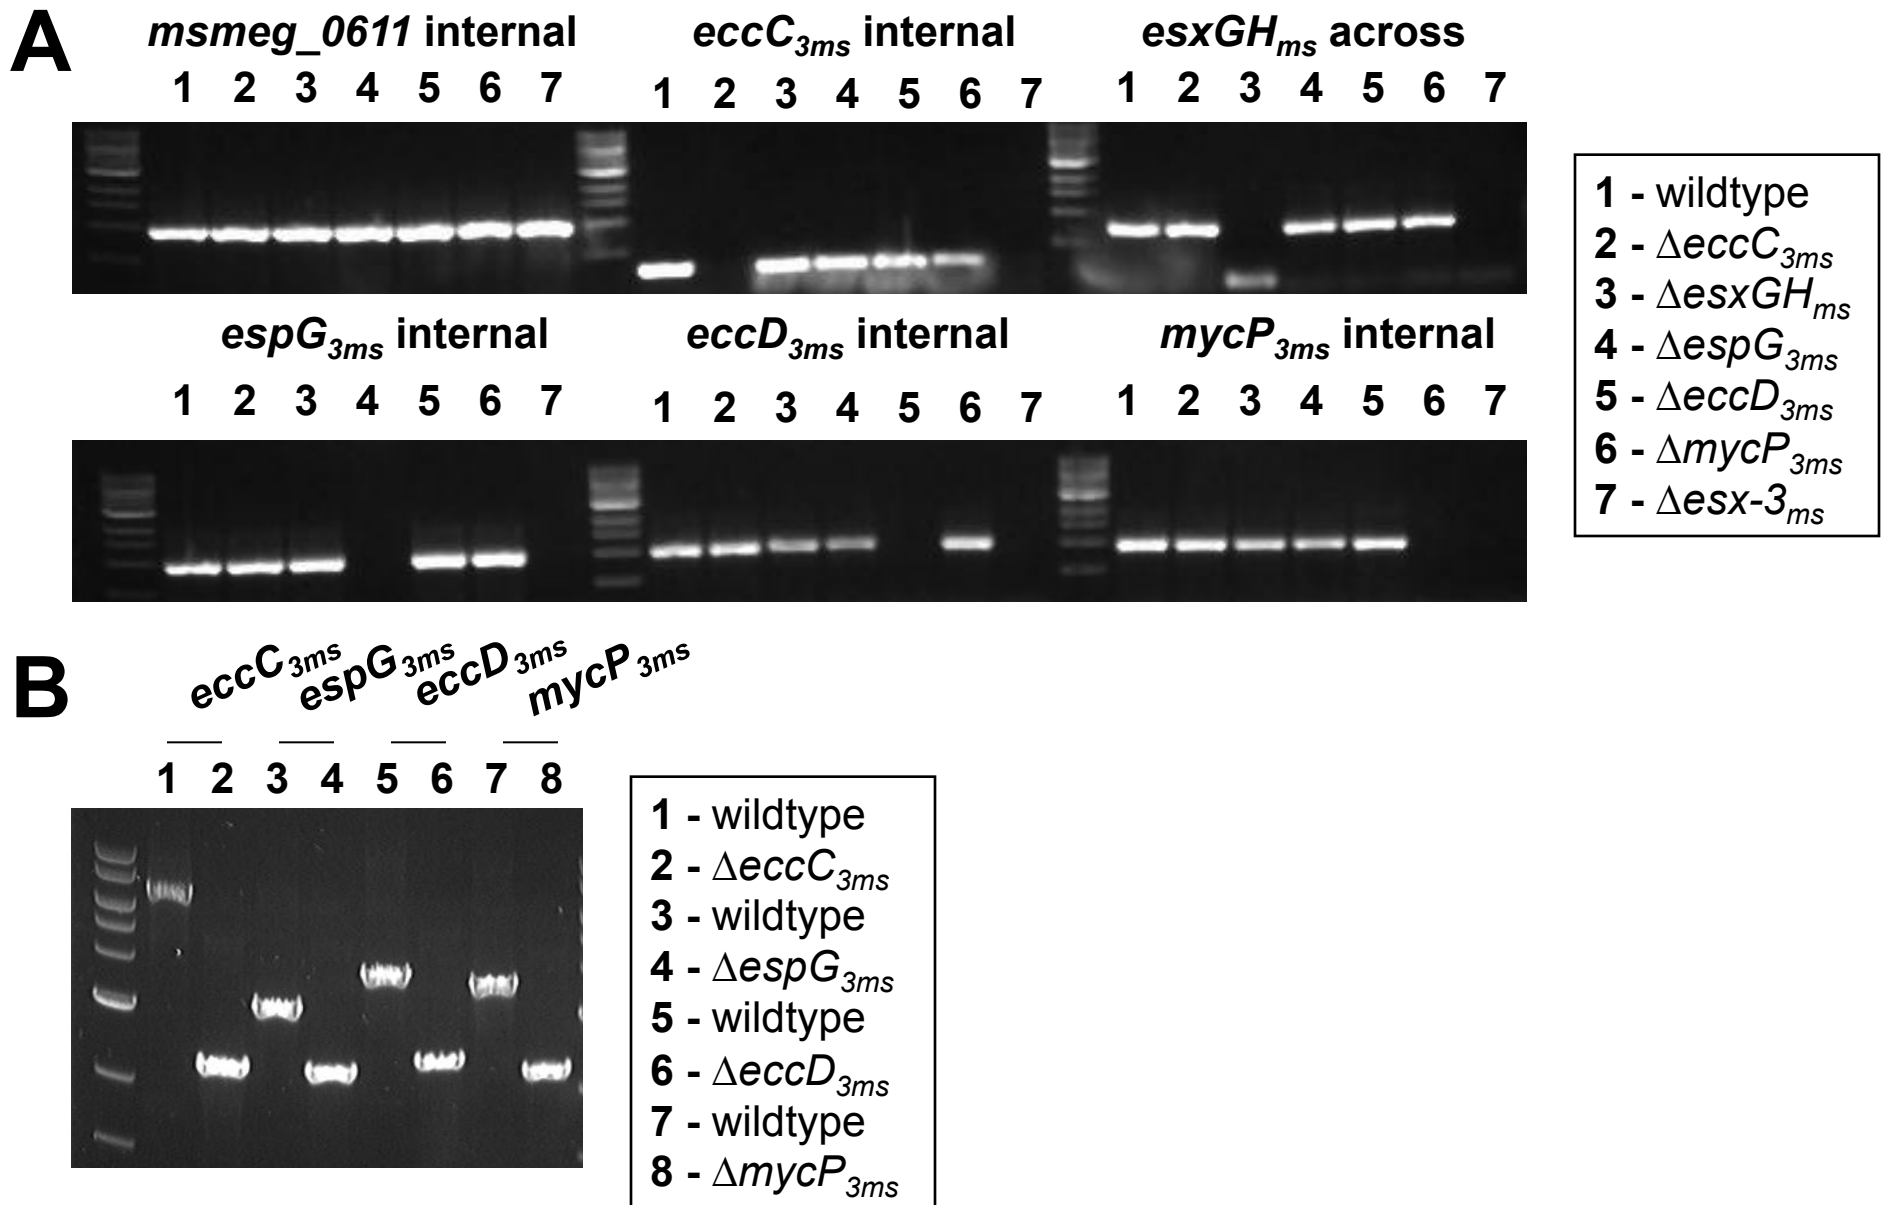

**Supplemental Fig. 1.** Confirmation of individual *esx-3* deletion mutants by PCR. A. Internal, primers that amplify within the specified gene, across, primers outside of the given gene that amplify across. Primers to *msmeg\_0611* are positive controls. B. Primers outside the specified gene that amplify across.
