# Supplementary material for: Mycobacterial Esx-3 Requires Multiple Components for Iron Acquisition
Source: PubMed Central journal article supplement — mBio. 2014 May 6;5(3):e01073-14. doi: 10.1128/mBio.01073-14 (PMC4010830; doi:10.1128/mbio.01073-14), 2014-05-06
Supplement: mbo002141823sf02.pdf [file mbo002141823sf02.pdf]

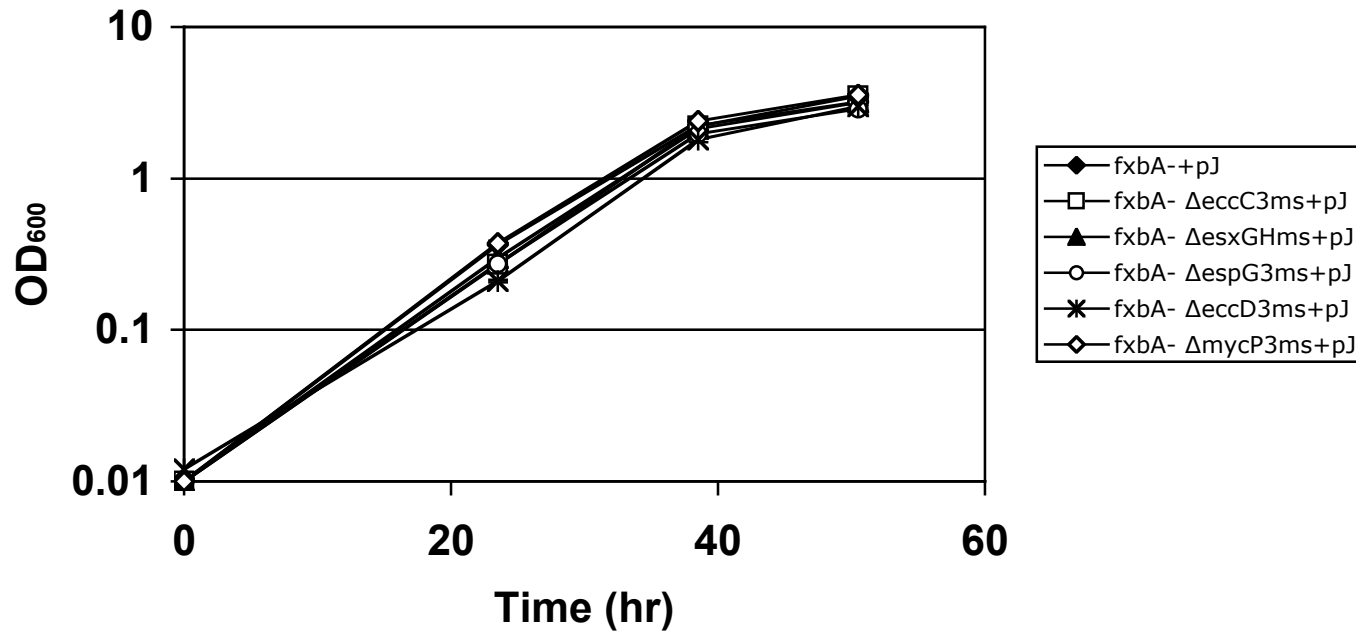

**Supplemental Fig. 2.** Growth of *fxbA*- and *fxbA*-  $\Delta$ *esx-3* *M. smegmatis* mutants in iron-replete medium. pJ, pJEB402 vector. Representative data from at least three independent experiments are shown.
