# Supplementary material for: Mycobacterial Esx-3 Requires Multiple Components for Iron Acquisition
Source: PubMed Central journal article supplement — mBio. 2014 May 6;5(3):e01073-14. doi: 10.1128/mBio.01073-14 (PMC4010830; doi:10.1128/mbio.01073-14), 2014-05-06
Supplement: mbo002141823sf03.pdf [file mbo002141823sf03.pdf]

| protein            | sequence                                                                                                        | MRM peptide            |
|--------------------|-----------------------------------------------------------------------------------------------------------------|------------------------|
| EsxG <sub>ms</sub> | MSLLDAHIPQLIASEANFGAKAALMRSTIAQAEQA<br>AMSSQAFHMGESAAFQAAHARFVEVSAKVNAL<br>LDIAQLNIGDAASSYVAQDAAAASYTGI         | (R)FVEVSAK(V)          |
| EsxH <sub>ms</sub> | MSQIMYNYPAMLAHAAEMNTYSGALHAVGADIAA<br>EQHALASAWQGDTGMTYQAWQAQWNQAMEEL<br>VRAYR <u>AMATTHEQNTMAMSARDQAEGAKWG</u> | (R)AMATTHEQNTmAmSAR(D) |
|                    |                                                                                                                 | (R)AMATTHEQNTMAmSAR(D) |
|                    |                                                                                                                 | (R)AmATTHEQNTMAmSAR(D) |
|                    |                                                                                                                 | (R)AMATTHEQNTMAMSAR(D) |

**Supplemental Fig. 3.** Amino acid sequences of the proteins EsxG<sub>ms</sub> and EsxH<sub>ms</sub> and the peptides selected for quantitative analysis of these proteins by MRM-MS.
