# Supplementary material for: Mycobacterial Esx-3 Requires Multiple Components for Iron Acquisition
Source: PubMed Central journal article supplement — mBio. 2014 May 6;5(3):e01073-14. doi: 10.1128/mBio.01073-14 (PMC4010830; doi:10.1128/mbio.01073-14), 2014-05-06
Supplement: mbo002141823sf04.pdf [file mbo002141823sf04.pdf]

| peptide          | LOD<br>(fmol/ug) | LOD<br>(pg/ug) | LOQ<br>(fmol/ug) | LOQ<br>(pg/ug) |
|------------------|------------------|----------------|------------------|----------------|
| AMATTHEQNTMAMSAR | 0.125            | 1.31           | 0.375            | 3.93           |
| AmATTHEQNTMAmSAR | 0.047            | 0.49           | 0.142            | 1.48           |
| AMATTHEQNTmAmSAR | 0.037            | 0.39           | 0.112            | 1.16           |
| FVEVSAK          | 0.042            | 0.417          | 0.127            | 1.252          |

**Supplemental Fig. 4.** The limits of detection (LOD) and quantitation (LOQ) for the peptides shown. Values are based on the most abundant interference-free transition ion from each peptide. The units are in fmol or pg of protein per input ug of cell culture protein.
