# Supplementary material for: Mycobacterial Esx-3 Requires Multiple Components for Iron Acquisition
Source: PubMed Central journal article supplement — mBio. 2014 May 6;5(3):e01073-14. doi: 10.1128/mBio.01073-14 (PMC4010830; doi:10.1128/mbio.01073-14), 2014-05-06
Supplement: mbo002141823sf05.pdf [file mbo002141823sf05.pdf]

| <b>EsxG<sub>ms</sub>: FVEVSAK</b>     |                      |                  |
|---------------------------------------|----------------------|------------------|
| <b>Sample</b>                         | <b>Concentration</b> |                  |
|                                       | <b>fmol/μg</b>       | <b>pg/μg</b>     |
| <i>ΔesxGH<sub>ms</sub></i>            | ND                   | ND               |
| <i>ΔeccC<sub>3ms</sub></i>            | 0.087 +/- 0.005      | 0.865 +/- 0.050  |
| <i>ΔespG<sub>3ms</sub></i>            | 0.073 +/- 0.006      | 0.726 +/- 0.060  |
| <i>ΔeccD<sub>3ms</sub></i>            | 0.130 +/- 0.005      | 0.1.29 +/- 0.050 |
| <i>ΔmycP<sub>3ms</sub></i>            | 0.312 +/- 0.007      | 3.10 +/- 0.070   |
| comp <i>ΔesxGH<sub>ms</sub></i>       | 4.79 +/- 0.16        | 47.61 +/- 1.63   |
| comp <i>ΔeccC<sub>3ms</sub></i>       | 0.79 +/- 0.01        | 7.81 +/- 0.11    |
| comp <i>ΔespG<sub>3ms</sub></i>       | 12.86 +/- 0.22       | 127.83 +/- 2.19  |
| comp <i>ΔeccD<sub>3ms</sub></i>       | 0.29 +/- 0.02        | 2.85 +/- 0.22    |
| comp <i>ΔmycP<sub>3ms</sub></i>       | 0.47 +/- 0.01        | 4.62 +/- 0.07    |
| wildtype                              | 23.80 +/- 0.93       | 236.57 +/- 9.24  |
| wcl - <i>ΔespG<sub>3ms</sub></i>      | 1.740 +/- 0.030      | 17.296 +/- 0.298 |
| wcl – comp <i>ΔespG<sub>3ms</sub></i> | 1.720 +/- 0.040      | 17.097 +/- 0.398 |
| wcl - wildtype                        | 1.310 +/- 0.030      | 13.021 +/- 0.298 |

| <b>EsxH<sub>ms</sub>: AMATTHEQNTMAMSAR</b> |                      |                 |
|--------------------------------------------|----------------------|-----------------|
| <b>Sample</b>                              | <b>Concentration</b> |                 |
|                                            | <b>fmol/μg</b>       | <b>pg/μg</b>    |
| <i>ΔesxGH<sub>ms</sub></i>                 | ND                   | ND              |
| <i>ΔeccC<sub>3ms</sub></i>                 | ND                   | ND              |
| <i>ΔespG<sub>3ms</sub></i>                 | ND                   | ND              |
| <i>ΔeccD<sub>3ms</sub></i>                 | ND                   | ND              |
| <i>ΔmycP<sub>3ms</sub></i>                 | 0.055 +/- 0.003      | 0.576 +/- 0.031 |
| comp <i>ΔesxGH<sub>ms</sub></i>            | 0.874 +/- 0.029      | 9.15 +/- 0.30   |
| comp <i>ΔeccC<sub>3ms</sub></i>            | 0.178 +/- 0.006      | 1.86 +/- 0.07   |
| comp <i>ΔespG<sub>3ms</sub></i>            | 3.16 +/- 0.04        | 33.05 +/- 0.42  |
| comp <i>ΔeccD<sub>3ms</sub></i>            | ND                   | ND              |
| comp <i>ΔmycP<sub>3ms</sub></i>            | 0.067 +/- 0.004      | 0.701 +/- 0.042 |
| wildtype                                   | 3.32 +/- 0.05        | 34.71 +/- 0.49  |
| wcl - <i>ΔespG<sub>3ms</sub></i>           | 0.277 +/- 0.034      | 2.900 +/- 0.356 |
| wcl – comp <i>ΔespG<sub>3ms</sub></i>      | 0.176 +/- 0.009      | 1.843 +/- 0.094 |
| wcl - wildtype                             | ND                   | ND              |

**Supplemental Fig. 5.** Supernatant and whole cell (wcl) peptide concentrations for one of two biological replicates. ND, measured peptide concentration was below the limit of detection (LOD).
