# Supplementary material for: Mycobacterial Esx-3 Requires Multiple Components for Iron Acquisition
Source: PubMed Central journal article supplement — mBio. 2014 May 6;5(3):e01073-14. doi: 10.1128/mBio.01073-14 (PMC4010830; doi:10.1128/mbio.01073-14), 2014-05-06
Supplement: mbo002141823sf06.pdf [file mbo002141823sf06.pdf]

|                           | SDS (%) | vancomycin ( $\mu\text{g}/\text{ml}$ ) | rifampicin ( $\mu\text{g}/\text{ml}$ ) |
|---------------------------|---------|----------------------------------------|----------------------------------------|
| wildtype                  | 0.004   | 5                                      | 10                                     |
| $\Delta\text{eccC}_{3ms}$ | 0.004   | 2.5                                    | 10                                     |
| $\Delta\text{esxGH}_{ms}$ | 0.004   | 5                                      | 10                                     |
| $\Delta\text{espG}_{3ms}$ | 0.004   | 5                                      | 10                                     |
| $\Delta\text{eccD}_{3ms}$ | 0.004   | 5                                      | 10                                     |
| $\Delta\text{mycP}_{3ms}$ | 0.004   | 5                                      | 10                                     |

**Supplemental Fig. 6.** Minimal inhibitory concentrations (MIC) for sodium dodecyl sulfate (SDS), vancomycin and rifampicin. Log phase cultures were diluted to an  $\text{OD}_{600}$  of 0.02 and grown in 7H9 medium containing serial dilutions of the given compound. The MICs were recorded as the lowest concentration of compound that prevented visible growth after three days. The experiment was performed in triplicate and repeated at least twice with the same results.
